# Supplementary material
Source: PubMed Central journal article supplement (PMC3131785)
Supplement: jm200488a_si_001.pdf [file jm200488a_si_001.pdf]

## Supporting Information

### Design, Synthesis, Biological Evaluation and Structure-Activity Relationships of Substituted Phenyl 4-(2-Oxoimidazolidin-1-yl)benzenesulfonates as New Tubulin Inhibitors Mimicking Combretastatin A-4

Sébastien Fortin,<sup>†,‡,\*</sup> Lianhu Wei,<sup>§</sup> Emmanuel Moreau,<sup>£</sup> Jacques Lacroix,<sup>†</sup> Marie-France Côté,<sup>†</sup> Éric Petitclerc,<sup>†,||</sup> Lakshmi P. Kotra,<sup>§,⊥</sup> and René C.-Gaudreault<sup>†,#,\*</sup>

<sup>†</sup> Unité des Biotechnologies et de Bioingénierie, Centre de recherche, C.H.U.Q., Hôpital Saint-François d'Assise, Québec, Québec, Canada G1L 3L5

<sup>‡</sup> Faculté de Pharmacie, Université Laval, Pavillon Vandry, Québec, Québec, Canada G1V 0A6

<sup>§</sup> Center for Molecular Design and Preformulations, Toronto General Research Institute, University Health Network, Toronto, Ontario, Canada M5G 1L7

<sup>£</sup> Clermont 1, Université d'Auvergne, Inserm, U 990, F-63000 Clermont-Ferrand, France

<sup>||</sup> Present address: Héma-Québec, 1070, avenue des Sciences-de-la-Vie, Québec, Québec, Canada G1V 5C3

<sup>⊥</sup> Department of Pharmaceutical Sciences, Leslie Dan Faculty of Pharmacy, University of Toronto, Toronto, Ontario, Canada M5S 3M2

<sup>#</sup> Faculté de Médecine, Université Laval, Pavillon Vandry, Québec, Québec, Canada G1V 0A6

**\*Corresponding authors:** Sébastien Fortin; Phone: 418-525-4444 ext. 52364, Fax: 418-525-4372 e-mail: [sebastien.fortin.1@ulaval.ca](mailto:sebastien.fortin.1@ulaval.ca) or René C.-Gaudreault; Phone: 418-525-4444 ext. 52363, Fax: 418-525-4372, e-mail: [rene.c-gaudreault@crsfa.ulaval.ca](mailto:rene.c-gaudreault@crsfa.ulaval.ca)

## Table of contents

**Scheme 1.** Synthesis of compound **88** and **89**. Reagents: (i) Al<sub>2</sub>O<sub>3</sub>/KF, CH<sub>3</sub>CN

General preparation of compounds **88** and **89**

**Table 1.** Evaluation of the antiproliferative activity of compounds **88** and **89** on HT-29, M21, and MCF-7 cell lines

**Table 2.** CoMSIA Models Predicted Activities of Models A, B, and C

**Table 3.** CoMFA Models Predicted Activities of Models G, H, and I

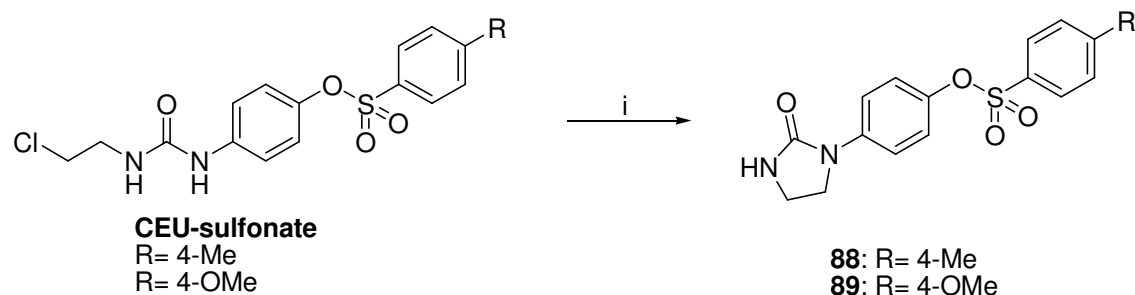

**Scheme 1.** Synthesis of compound **88** and **89**. Reagents: (i)  $\text{Al}_2\text{O}_3\cdot\text{KF}$ ,  $\text{CH}_3\text{CN}$ .

**General preparation of compounds 88 and 89.** To a stirred solution of the appropriate *N*-phenyl-*N'*-(2-chloroethyl)urea derivative (0.4 mmol) in acetonitrile (10 mL) a mixture of aluminum oxide and potassium fluoride (6:4) (4.0 mmol) was added. The suspension was refluxed overnight. After cooling, the mixture was filtered, and the solvent evaporated under reduced pressure. The residue was purified by flash chromatography on silica gel.

**4-(2-oxoimidazolidin-1-yl)phenyl 4-methylbenzenesulfonate (88).** Flash chromatography (methylene chloride to methylene chloride/methanol (90:10)) and washed with acetone. Yield: 20%; White solid; m.p.: 149-150°C; IR: 2877, 1683  $\text{cm}^{-1}$ ;  $^1\text{H}$  NMR ( $\text{DMSO-d}_6$ )  $\delta$  7.75-7.72 (m, 2H, Ar), 7.55-7.47 (m, 4H, Ar), 7.07 (s, 1H, NH), 6.96-6.93 (m, 2H, Ar), 3.84-3.79 (m, 2H,  $\text{CH}_2$ ), 3.42-3.36 (m, 2H,  $\text{CH}_2$ ), 2.44 (s, 3H,  $\text{CH}_3$ );  $^{13}\text{C}$  NMR ( $\text{DMSO-d}_6$ )  $\delta$  158.8, 145.7, 143.0, 139.8, 131.5, 130.2, 128.3, 122.2, 117.7, 44.4, 36.4, 21.2; HRMS (ES+)  $m/z$  found 333.0108;  $\text{C}_{16}\text{H}_{16}\text{N}_2\text{O}_4\text{S}$  ( $\text{M}^+ + \text{H}$ ) requires 333.0909.

**4-(2-oxoimidazolidin-1-yl)phenyl 4-methoxybenzenesulfonate (89).** Flash chromatography (methylene chloride to methylene chloride / ethyl acetate (70:30)). Yield: 33%; White solid; m.p.: 126-127°C; IR: 3236, 1688  $\text{cm}^{-1}$ ;  $^1\text{H}$  NMR ( $\text{CDCl}_3$ )  $\delta$  7.64-7.61 (m, 2H, Ar), 7.36-7.33 (m, 2H, Ar), 6.90-6.81 (m, 4H, Ar), 3.82-3.76 (m, 5H,  $\text{CH}_2$  and  $\text{CH}_3$ ), 3.48-3.43 (m, 2H,  $\text{CH}_2$ ), 3.36 (s, 1H, NH);  $^{13}\text{C}$  NMR ( $\text{CDCl}_3$ )  $\delta$  164.2, 159.9, 144.4, 138.9, 130.7, 126.3, 122.6, 118.4, 114.4, 55.7, 45.2, 37.2; HRMS (ES+)  $m/z$  found 348.9856;  $\text{C}_{16}\text{H}_{16}\text{N}_2\text{O}_5\text{S}$  ( $\text{M}^+ + \text{H}$ ) requires 349.0858.

**Table 1.** Evaluation of the antiproliferative activity of compounds **88** and **89** on HT-29, M21, and MCF-7 cell lines

| Compd     | $\text{IC}_{50}$ (nM) <sup>a</sup> |     |       |
|-----------|------------------------------------|-----|-------|
|           | HT-29                              | M21 | MCF-7 |
| <b>88</b> | 462                                | 282 | 579   |
| <b>89</b> | 882                                | 509 | 996   |

<sup>a</sup> $\text{IC}_{50}$ : Expressed as the concentration of drug inhibiting cell growth by 50%.

**Table 2.** CoMSIA Models Predicted Activities of Models A, B, and C

| Compd <sup>a</sup> | Model A |        | Model B |        | Model C |        |
|--------------------|---------|--------|---------|--------|---------|--------|
|                    | HT-29   |        | M21     |        | MCF7    |        |
|                    | Calcd   | Res    | Calcd   | Res    | Calcd   | Res    |
| <b>9</b>           | 7.005   | 0.477  | 7.09    | 0.495  | 6.934   | 0.588  |
| <b>10</b>          | 7.439   | -0.32  | 7.488   | -0.22  | 7.36    | -0.116 |
| <b>11</b>          | 7.055   | -0.242 | 7.135   | -0.21  | 6.976   | -0.16  |
| <b>12</b>          | 6.78    | 0.099  | 6.899   | -0.019 | 6.738   | 0.069  |
| <b>13</b>          | 6.464   | -0.101 | 6.554   | -0.097 | 6.371   | -0.071 |
| <b>14</b>          | 5.328   | -0.238 | 5.542   | -0.235 | 5.327   | -0.365 |
| <b>15</b>          | 6.801   | -1.27  | 6.914   | -1.066 | 6.752   | -1.23  |
| <b>16</b>          | 7.302   | -0.087 | 7.357   | -0.073 | 7.207   | -0.146 |
| <b>17</b>          | 7.494   | -0.375 | 7.524   | -0.309 | 7.381   | -0.219 |
| <b>18</b>          | 6.791   | -0.044 | 6.976   | -0.076 | 6.776   | -0.119 |
| <b>19</b>          | 6.992   | 0.402  | 7.099   | 0.528  | 6.912   | 0.167  |
| <b>20</b>          | 7.084   | 0.097  | 7.244   | 0.103  | 7.029   | 0.109  |
| <b>21</b>          | 7.084   | 0.21   | 7.188   | 0.278  | 7.008   | 0.204  |
| <b>22</b>          | 7.39    | -0.133 | 7.458   | -0.057 | 7.254   | -0.107 |
| <b>23</b>          | 7.223   | -0.501 | 7.432   | -0.608 | 7.157   | -0.588 |
| <b>24</b>          | 7.296   | 0.213  | 7.342   | 0.425  | 7.203   | 0.098  |
| <b>25</b>          | 7.269   | 0.023  | 7.314   | 0.095  | 7.176   | 0.125  |
| <b>26</b>          | 7.561   | 0.431  | 7.587   | 0.484  | 7.463   | 0.378  |
| <b>27</b>          | 7.475   | -0.093 | 7.491   | -0.104 | 7.367   | -0.188 |
| <b>28</b>          | 7.35    | 0.173  | 7.428   | 0.08   | 7.211   | 0.312  |
| <b>29</b>          | 7.085   | -0.126 | 7.198   | -0.27  | 6.962   | -0.203 |
| <b>30</b>          | 7.082   | 0.304  | 7.144   | 0.318  | 6.976   | 0.284  |
| <b>31</b>          | 7.17    | 0.372  | 7.269   | 0.544  | 7.08    | 0.42   |
| <b>32</b>          | 7.594   | -1.13  | 7.63    | -0.979 | 7.43    | -0.939 |
| <b>33</b>          | 7.523   | -0.051 | 7.523   | 0.047  | 7.398   | -0.107 |
| <b>34</b>          | 7.067   | 0.47   | 7.107   | 0.431  | 6.975   | 0.494  |
| <b>35</b>          | 7.18    | 0.562  | 7.264   | 0.478  | 7.109   | 0.613  |
| <b>36</b>          | 7.44    | 0.399  | 7.491   | 0.348  | 7.327   | 0.559  |
| <b>37</b>          | 7.297   | 0.08   | 7.381   | -0.004 | 7.205   | 0.062  |
| <b>38</b>          | 8.142   | -0.184 | 8.149   | -0.191 | 7.966   | -0.223 |
| <b>39</b>          | 6.93    | 0.066  | 6.969   | 0.027  | 6.804   | 0.417  |
| <b>40</b>          | 5.94    | 0.035  | 6.321   | 0.459  | 6.04    | 0.526  |
| <b>41</b>          | 7.526   | -0.033 | 7.558   | -0.064 | 7.428   | -0.101 |
| <b>42</b>          | 7.63    | -0.162 | 7.645   | -0.176 | 7.513   | -0.202 |
| <b>43</b>          | 7.415   | -0.242 | 7.51    | -0.336 | 7.335   | -0.279 |
| <b>44</b>          | 8.002   | 0.096  | 8.145   | -0.047 | 7.906   | 0.113  |
| <b>45</b>          | 8.175   | 0.223  | 8.289   | 0.109  | 8.063   | 0.238  |
| <b>46</b>          | 7.484   | 0.53   | 7.511   | 0.503  | 7.321   | 0.429  |
| <b>47</b>          | 7.323   | -0.199 | 7.373   | -0.249 | 7.203   | -0.212 |
| <b>48</b>          | 7.467   | -0.022 | 7.539   | -0.094 | 7.355   | -0.025 |
| <b>49</b>          | 7.371   | -0.231 | 7.413   | -0.274 | 7.24    | -0.199 |
| <b>50</b>          | 6.859   | 0.004  | 6.901   | -0.038 | 6.71    | 0.04   |
| <b>51</b>          | 6.086   | 0.088  | 6.448   | -0.008 | 6.159   | 0.062  |

|           |       |        |       |        |       |        |
|-----------|-------|--------|-------|--------|-------|--------|
| <b>52</b> | 7.012 | 0.102  | 7.054 | -0.241 | 6.908 | -0.191 |
| <b>53</b> | 6.69  | 0.424  | 6.719 | 0.395  | 6.563 | 0.384  |
| <b>54</b> | 6.132 | -0.022 | 6.149 | -0.039 | 6.003 | 0.033  |
| <b>55</b> | 6.989 | 0.37   | 7.069 | 0.29   | 6.907 | 0.342  |
| <b>56</b> | 6.944 | 0.023  | 7.021 | -0.003 | 6.849 | -0.007 |
| <b>57</b> | 6.578 | -0.312 | 6.619 | -0.353 | 6.467 | -0.417 |
| <b>58</b> | 4.796 | 0.204  | 4.86  | 0.14   | 4.68  | 0.32   |
| <b>59</b> | 6.932 | 0.128  | 7.074 | 0.163  | 6.877 | 0.178  |
| <b>60</b> | 6.845 | 0.062  | 6.91  | 0.141  | 6.751 | 0.029  |
| <b>61</b> | 6.874 | -0.053 | 6.928 | 0.046  | 6.735 | -0.049 |
| <b>62</b> | 5.815 | 0.185  | 5.88  | 0.366  | 5.721 | 0.279  |
| <b>63</b> | 5.887 | -0.024 | 6.269 | -0.231 | 5.987 | -0.169 |
| <b>64</b> | 6.938 | -0.198 | 7.027 | -0.134 | 6.863 | -0.376 |
| <b>65</b> | 7.211 | -0.056 | 7.35  | -0.09  | 7.085 | -0.085 |
| <b>66</b> | 6.221 | 0.1    | 6.417 | 0.118  | 6.217 | -0.102 |
| <b>67</b> | 5.298 | -0.599 | 5.458 | -0.759 | 5.3   | -0.601 |
| <b>68</b> | 5.481 | 0.048  | 5.634 | -0.092 | 5.434 | -0.113 |
| <b>69</b> | 5.188 | 0.113  | 5.23  | 0.071  | 5.172 | 0.129  |
| <b>70</b> | 5.278 | 0.023  | 5.294 | 0.007  | 5.246 | 0.055  |
| <b>71</b> | 5.669 | -0.368 | 5.642 | -0.341 | 5.606 | -0.305 |
| <b>72</b> | 5.507 | -0.206 | 5.518 | -0.217 | 5.471 | -0.17  |
| <b>73</b> | 5.825 | -0.277 | 5.867 | -0.123 | 5.737 | -0.37  |
| <b>74</b> | 5.389 | -0.088 | 5.455 | 0.048  | 5.312 | -0.011 |
| <b>75</b> | 5.677 | -0.376 | 5.688 | -0.387 | 5.655 | -0.354 |
| <b>76</b> | 5.365 | -0.064 | 5.369 | -0.068 | 5.332 | -0.031 |
| <b>77</b> | 5.612 | -0.311 | 5.657 | -0.356 | 5.573 | -0.272 |
| <b>78</b> | 5.691 | 0.622  | 5.808 | 0.804  | 5.638 | 0.497  |
| <b>79</b> | 5.332 | 0.81   | 5.368 | 0.564  | 5.308 | 0.675  |
| <b>80</b> | 5.294 | 0.007  | 5.386 | -0.085 | 5.29  | 0.011  |
| <b>81</b> | 5.193 | 0.108  | 5.217 | 0.084  | 5.158 | 0.143  |
| <b>88</b> | 6.204 | 0.132  | 6.305 | 0.245  | 6.145 | 0.093  |
| <b>89</b> | 6.127 | -0.073 | 6.203 | 0.09   | 6.055 | -0.053 |

<sup>a</sup>Compounds **88** and **89** were included in the models but were not described in this study. Synthesis, chemical characterization and antiproliferative activity are described in the supplemental data section.

**Table 3.** CoMFA Models Predicted Activities of Models G, H, and I

| Compd <sup>a</sup> | Model G<br>HT-29 |        | Model H<br>M21 |        | Model I<br>MCF7 |        |
|--------------------|------------------|--------|----------------|--------|-----------------|--------|
|                    | Calcd            | Res    | Calcd          | Res    | Calcd           | Res    |
| 9                  | 6.975            | 0.507  | 7.053          | 0.532  | 6.904           | 0.619  |
| 10                 | 7.305            | -0.186 | 7.37           | -0.103 | 7.232           | 0.012  |
| 11                 | 7.083            | -0.27  | 7.19           | -0.265 | 7.014           | -0.198 |
| 12                 | 7.057            | -0.178 | 7.142          | -0.263 | 6.979           | -0.172 |
| 13                 | 6.766            | -0.404 | 6.855          | -0.398 | 6.676           | -0.376 |
| 14                 | 5.436            | -0.346 | 5.638          | -0.33  | 5.435           | -0.473 |
| 15                 | 6.757            | -1.227 | 6.891          | -1.043 | 6.718           | -1.196 |
| 16                 | 7.099            | 0.116  | 7.115          | 0.169  | 7.002           | 0.059  |
| 17                 | 7.421            | -0.302 | 7.455          | -0.24  | 7.307           | -0.146 |
| 18                 | 6.968            | -0.22  | 7.072          | -0.173 | 6.89            | -0.233 |
| 19                 | 7.408            | -0.013 | 7.528          | 0.099  | 7.304           | -0.226 |
| 20                 | 7.201            | -0.02  | 7.412          | -0.066 | 7.131           | 0.007  |
| 21                 | 7.069            | 0.225  | 7.215          | 0.251  | 7.007           | 0.205  |
| 22                 | 7.587            | -0.33  | 7.632          | -0.231 | 7.416           | -0.269 |
| 23                 | 6.707            | 0.015  | 6.797          | 0.027  | 6.614           | -0.045 |
| 24                 | 7.099            | 0.409  | 7.152          | 0.615  | 7.017           | 0.284  |
| 25                 | 7.094            | 0.199  | 7.134          | 0.274  | 7.008           | 0.293  |
| 26                 | 7.577            | 0.415  | 7.605          | 0.467  | 7.473           | 0.369  |
| 27                 | 7.595            | -0.213 | 7.636          | -0.249 | 7.482           | -0.303 |
| 28                 | 7.282            | 0.241  | 7.419          | 0.09   | 7.149           | 0.374  |
| 29                 | 6.955            | 0.003  | 7.162          | -0.234 | 6.849           | -0.089 |
| 30                 | 6.865            | 0.521  | 6.958          | 0.505  | 6.794           | 0.466  |
| 31                 | 7.376            | 0.166  | 7.512          | 0.3    | 7.287           | 0.213  |
| 32                 | 7.146            | -0.681 | 7.109          | -0.457 | 6.998           | -0.507 |
| 33                 | 7.366            | 0.105  | 7.4            | 0.17   | 7.262           | 0.029  |
| 34                 | 7.023            | 0.515  | 7.104          | 0.434  | 6.957           | 0.511  |
| 35                 | 7.454            | 0.288  | 7.529          | 0.214  | 7.352           | 0.37   |
| 36                 | 7.276            | 0.562  | 7.375          | 0.464  | 7.189           | 0.697  |
| 37                 | 7.071            | 0.306  | 7.14           | 0.237  | 6.991           | 0.276  |
| 38                 | 7.874            | 0.084  | 7.847          | 0.112  | 7.687           | 0.055  |
| 39                 | 6.992            | 0.004  | 7.014          | -0.018 | 6.889           | 0.333  |
| 40                 | 5.728            | 0.247  | 5.989          | 0.79   | 5.735           | 0.831  |
| 41                 | 7.811            | -0.317 | 7.832          | -0.339 | 7.689           | -0.362 |
| 42                 | 7.972            | -0.504 | 7.986          | -0.517 | 7.832           | -0.52  |
| 43                 | 7.701            | -0.527 | 7.746          | -0.573 | 7.577           | -0.522 |
| 44                 | 8.255            | -0.157 | 8.413          | -0.315 | 8.12            | -0.102 |
| 45                 | 8.357            | 0.041  | 8.372          | 0.026  | 8.18            | 0.121  |
| 46                 | 7.394            | 0.62   | 7.466          | 0.548  | 7.261           | 0.488  |
| 47                 | 6.921            | 0.203  | 6.93           | 0.194  | 6.826           | 0.165  |
| 48                 | 7.191            | 0.253  | 7.222          | 0.223  | 7.086           | 0.244  |
| 49                 | 6.99             | 0.149  | 6.978          | 0.161  | 6.877           | 0.164  |
| 50                 | 6.619            | 0.244  | 6.573          | 0.29   | 6.495           | 0.254  |
| 51                 | 6.305            | -0.131 | 6.53           | -0.09  | 6.259           | -0.039 |

|           |       |        |       |        |       |        |
|-----------|-------|--------|-------|--------|-------|--------|
| <b>52</b> | 6.885 | 0.229  | 6.957 | -0.144 | 6.808 | -0.092 |
| <b>53</b> | 6.652 | 0.462  | 6.762 | 0.352  | 6.576 | 0.37   |
| <b>54</b> | 5.947 | 0.163  | 6.033 | 0.077  | 5.884 | 0.153  |
| <b>55</b> | 7.305 | 0.053  | 7.412 | -0.053 | 7.212 | 0.037  |
| <b>56</b> | 6.852 | 0.114  | 6.907 | 0.111  | 6.754 | 0.088  |
| <b>57</b> | 6.632 | -0.366 | 6.7   | -0.434 | 6.536 | -0.486 |
| <b>58</b> | 5.225 | -0.225 | 5.317 | -0.317 | 5.129 | -0.129 |
| <b>59</b> | 6.84  | 0.221  | 6.96  | 0.276  | 6.764 | 0.291  |
| <b>60</b> | 6.783 | 0.123  | 6.886 | 0.164  | 6.724 | 0.056  |
| <b>61</b> | 6.862 | -0.041 | 6.854 | 0.121  | 6.704 | -0.018 |
| <b>62</b> | 5.768 | 0.232  | 5.847 | 0.398  | 5.725 | 0.275  |
| <b>63</b> | 5.66  | 0.204  | 5.933 | 0.105  | 5.672 | 0.146  |
| <b>64</b> | 7.297 | -0.557 | 7.418 | -0.525 | 7.194 | -0.708 |
| <b>65</b> | 6.545 | 0.61   | 6.752 | 0.508  | 6.49  | 0.51   |
| <b>66</b> | 6.505 | -0.185 | 6.678 | -0.143 | 6.475 | -0.359 |
| <b>67</b> | 5.485 | -0.786 | 5.615 | -0.916 | 5.491 | -0.792 |
| <b>68</b> | 5.456 | 0.072  | 5.553 | -0.011 | 5.409 | -0.088 |
| <b>69</b> | 5.292 | 0.009  | 5.355 | -0.054 | 5.285 | 0.016  |
| <b>70</b> | 5.148 | 0.153  | 5.191 | 0.11   | 5.138 | 0.163  |
| <b>71</b> | 5.359 | -0.058 | 5.324 | -0.023 | 5.318 | -0.017 |
| <b>72</b> | 5.315 | -0.014 | 5.29  | 0.011  | 5.282 | 0.019  |
| <b>73</b> | 5.786 | -0.237 | 5.877 | -0.132 | 5.7   | -0.334 |
| <b>74</b> | 5.48  | -0.179 | 5.639 | -0.135 | 5.418 | -0.117 |
| <b>75</b> | 5.75  | -0.449 | 5.772 | -0.471 | 5.727 | -0.426 |
| <b>76</b> | 5.474 | -0.173 | 5.507 | -0.206 | 5.457 | -0.156 |
| <b>77</b> | 5.649 | -0.348 | 5.67  | -0.369 | 5.611 | -0.31  |
| <b>78</b> | 5.659 | 0.654  | 5.793 | 0.819  | 5.607 | 0.528  |
| <b>79</b> | 5.55  | 0.593  | 5.598 | 0.333  | 5.527 | 0.456  |
| <b>80</b> | 5.294 | 0.007  | 5.384 | -0.083 | 5.276 | 0.025  |
| <b>81</b> | 5.121 | 0.18   | 5.153 | 0.148  | 5.114 | 0.187  |
| <b>88</b> | 6.745 | -0.409 | 6.969 | -0.419 | 6.709 | -0.472 |
| <b>89</b> | 6.522 | -0.467 | 6.679 | -0.385 | 6.48  | -0.478 |

<sup>a</sup>Compounds **88** and **89** were included in the models but were not described in this study. Synthesis, chemical characterization and antiproliferative activity are described in the supplemental data.
